# Supplementary material
Source: Springer Nature journal article supplement (https://www.springermedizin.de/resource/supplementary/12902_2013_201_MOESM1_ESM.pdf/9515744)

# Women

## ATPIII

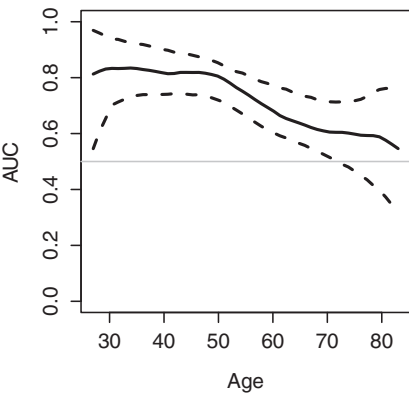

## IDF

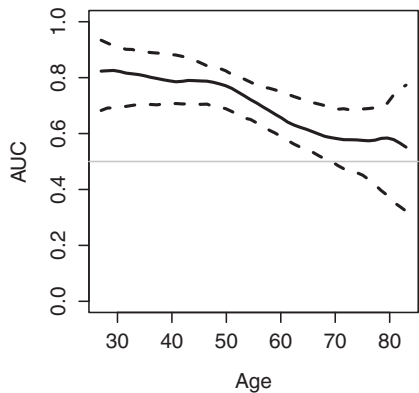

# Men

## ATPIII

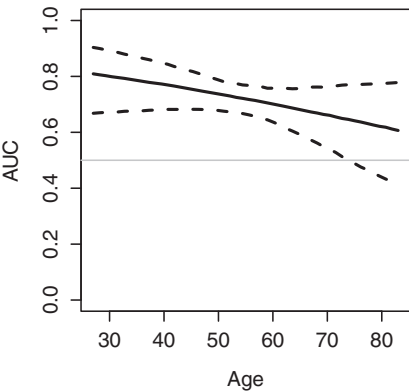

## IDF

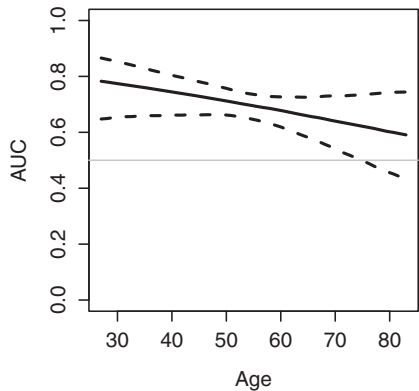

Supplement: MOESM1 [file 9515744]
